# Supplementary material
Source: ML conference proceedings conference paper supplement (https://openaccess.thecvf.com/content/WACV2023/html/Mathur_SLI-pSp_Injecting_Multi-Scale_WACV_2023_paper.html)
Supplement: Supplementary file 1 [file Mathur_SLI-pSp_Injecting_Multi-Scale_WACV_2023_supplemental.pdf]

# SLI-pSp: Supplementary

Aradhya Neeraj Mathur\*  
IIITD  
aradhyam@iiitd.ac.in

Anish Madan\*  
IIITD  
anish16223@iiitd.ac.in

Ojaswa Sharma  
IIITD  
ojaswa@iiitd.ac.in

## 1. Edge2Image Results

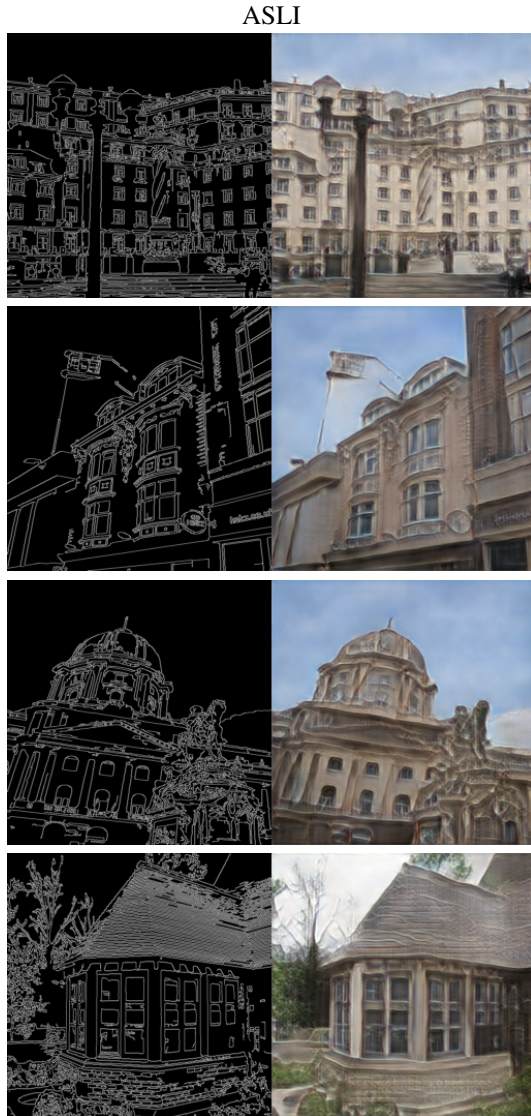

Figure 1. Additional Results generated by ASLI-pSp on Places2-CustomBuildings dataset for Edges to RGB Image task

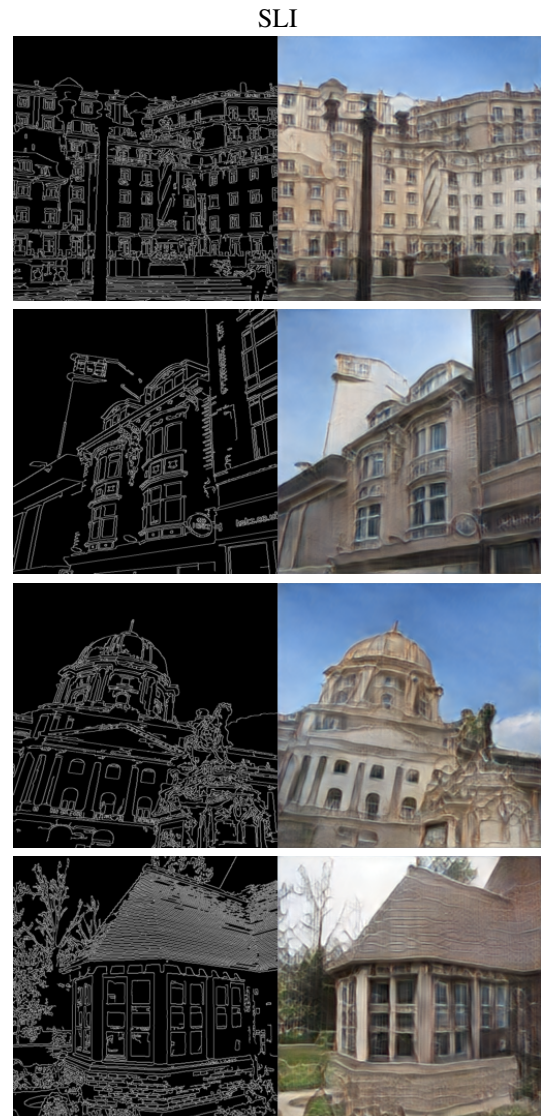

Figure 2. Additional Results generated by SLI-pSp on Places2-CustomBuildings dataset.

---

\*These authors contributed equally to this work.

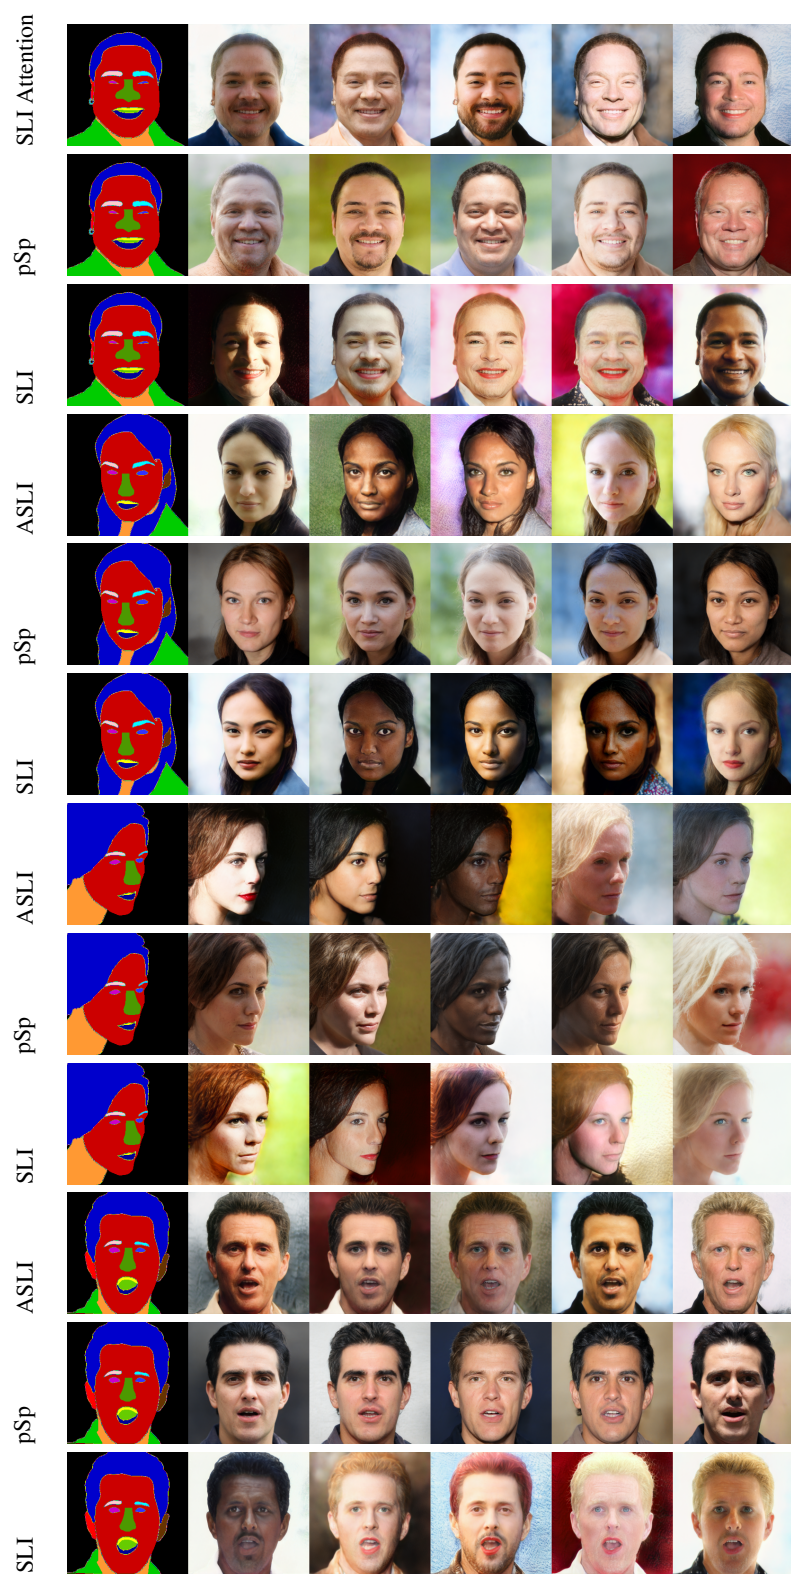

Figure 3. Multi-Modal Synthesis Results on Seg2Face task

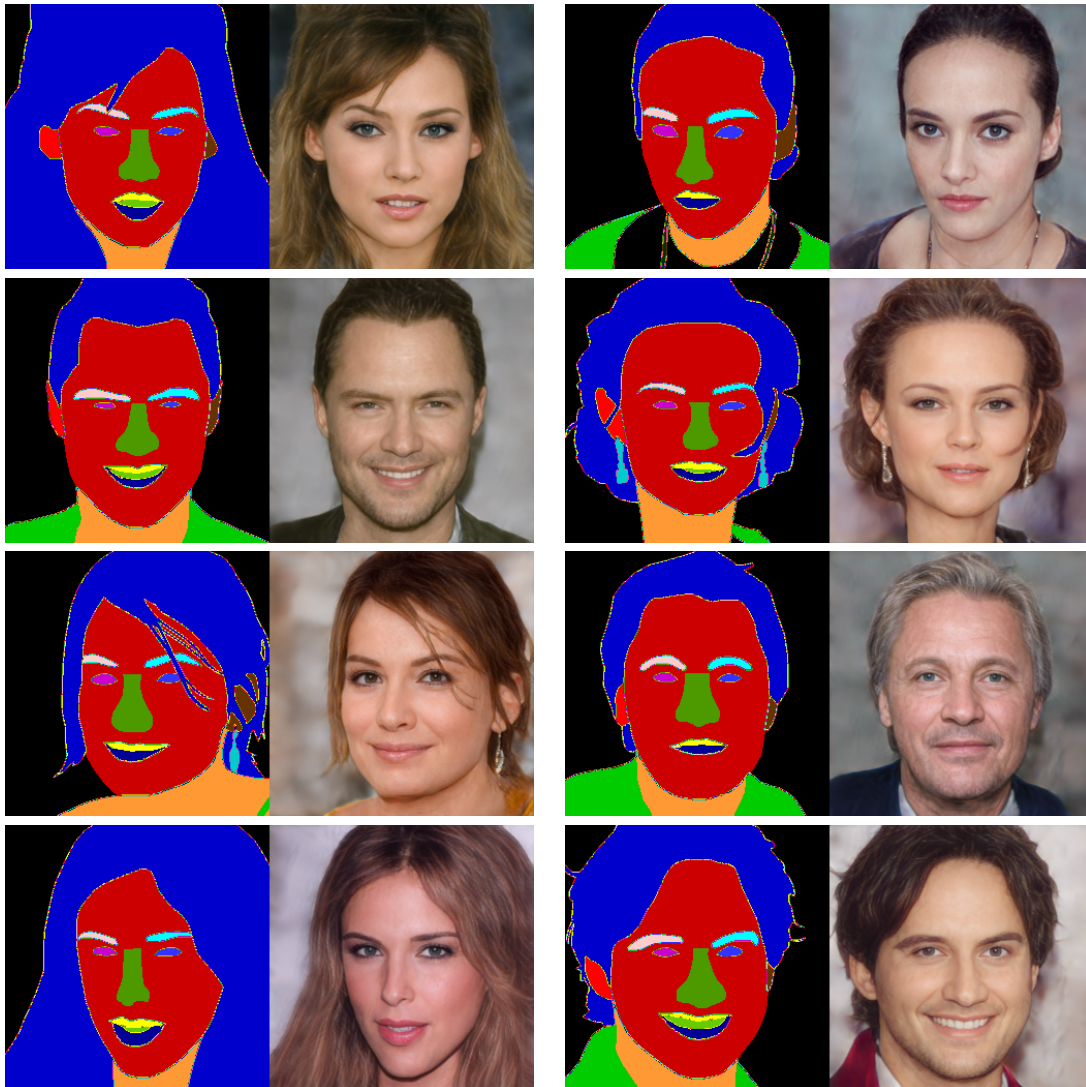

Figure 4. Additional Results generated by SLI-pSp on Seg2Face task



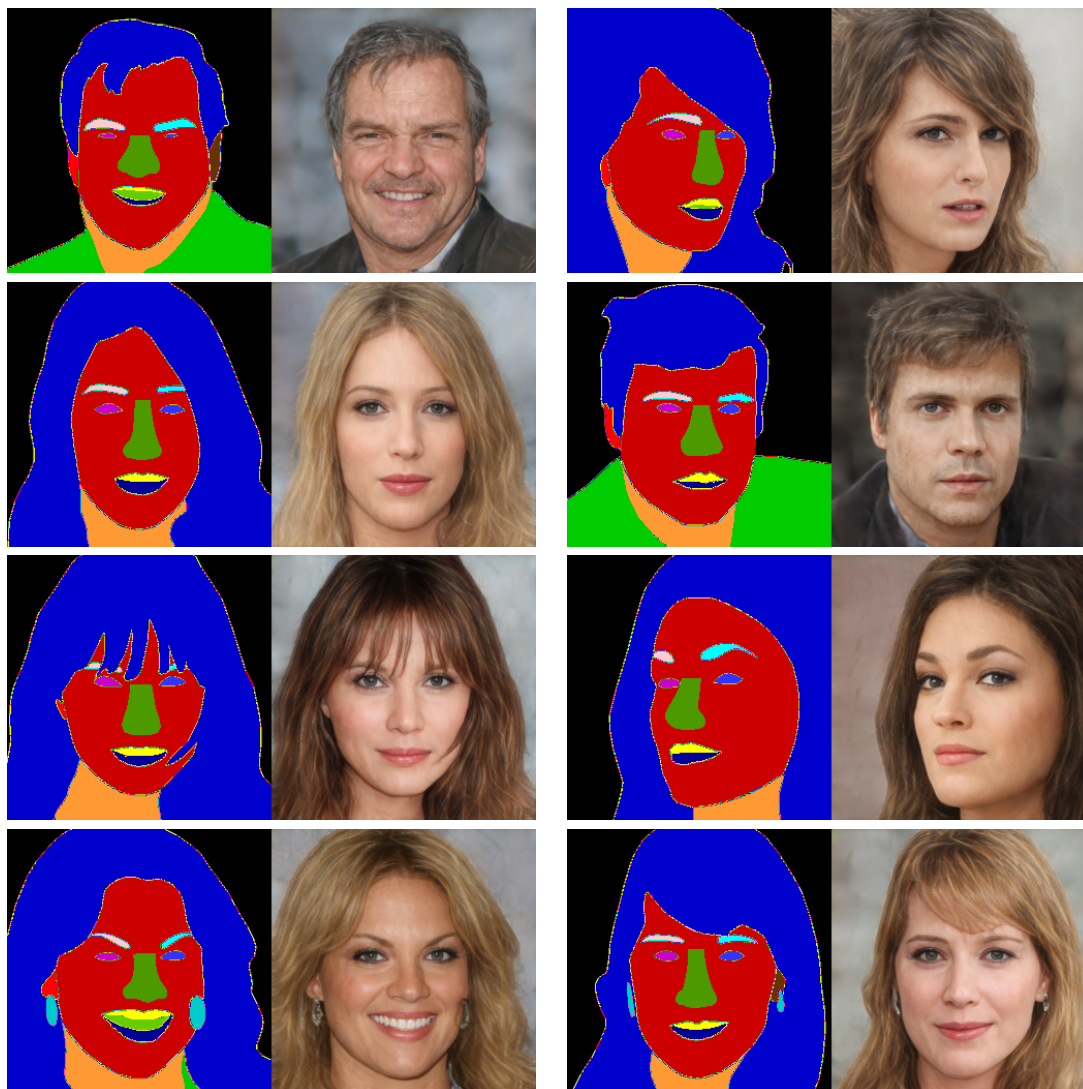

Figure 5. Additional Results generated by ASLI-pSp on Seg2Face task



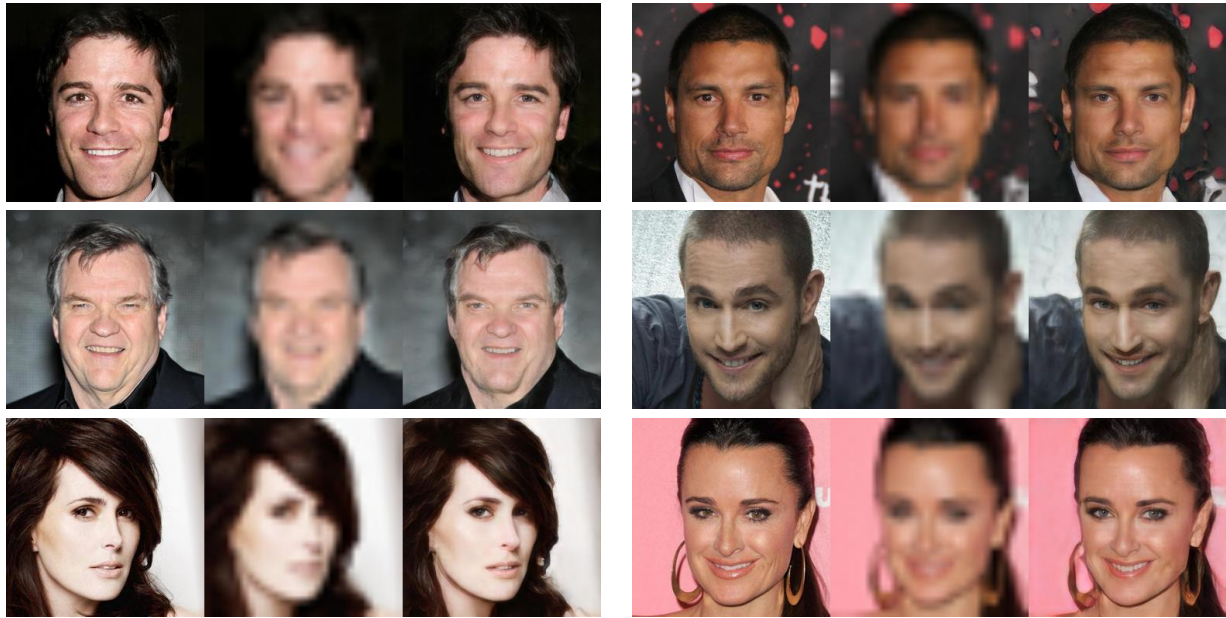

Figure 6. Additional Results generated by SLI-pSp on Super resolution task (8x downsampling) on CelebA

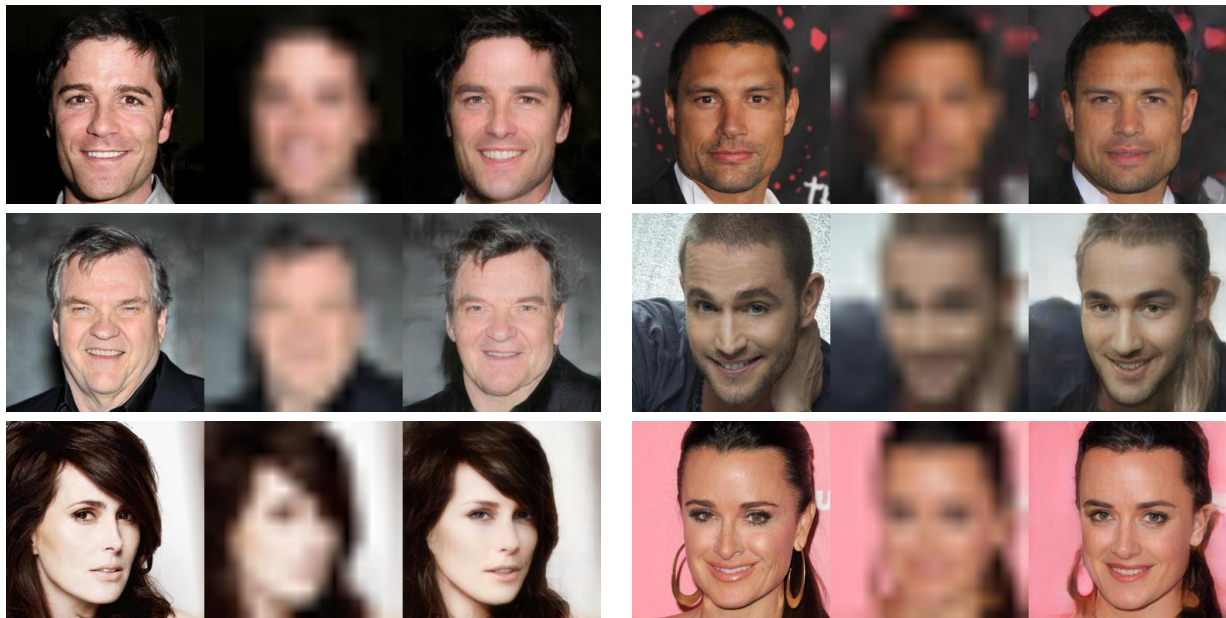

Figure 7. Additional Results generated by SLI-pSp on Super resolution task (16x downsampling) on CelebA

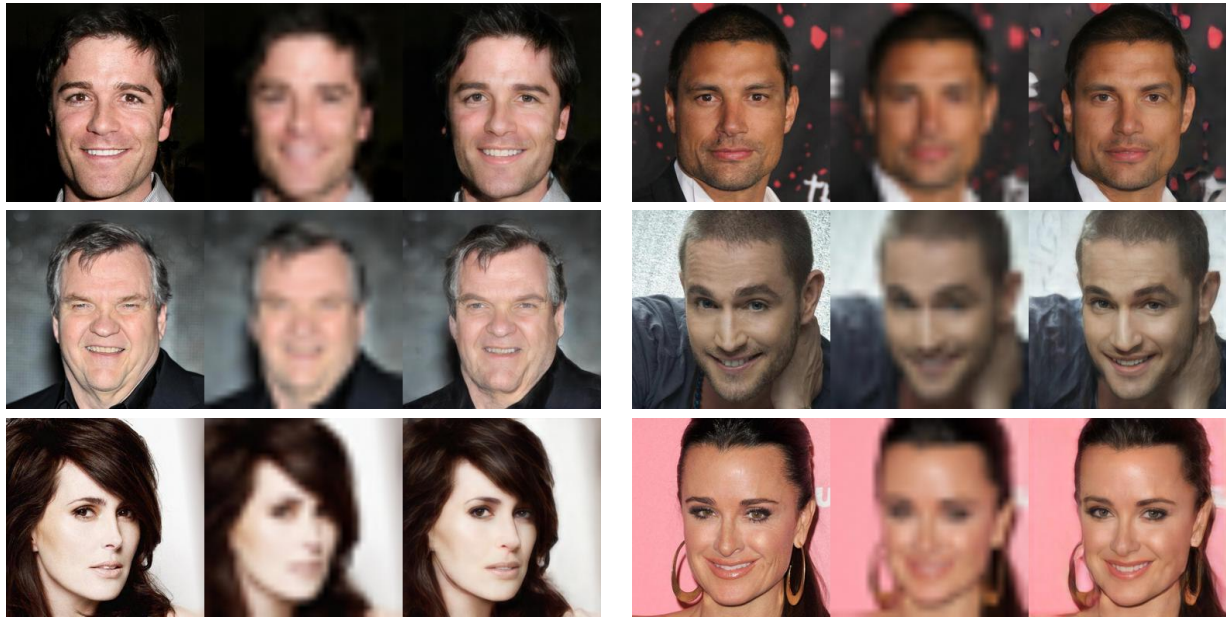

Figure 8. Additional Results generated by ASLI-pSp on Super resolution task (8x downsampling) on CelebA

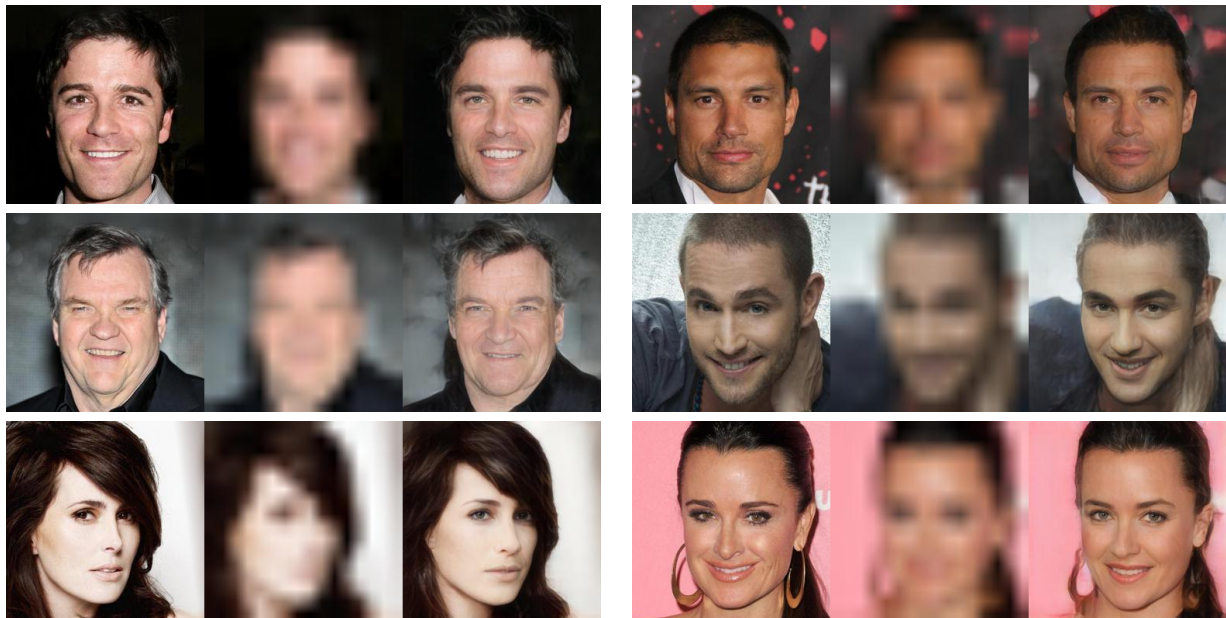

Figure 9. Additional Results generated by ASLI-pSp on Super resolution task (16x downsampling) on CelebA



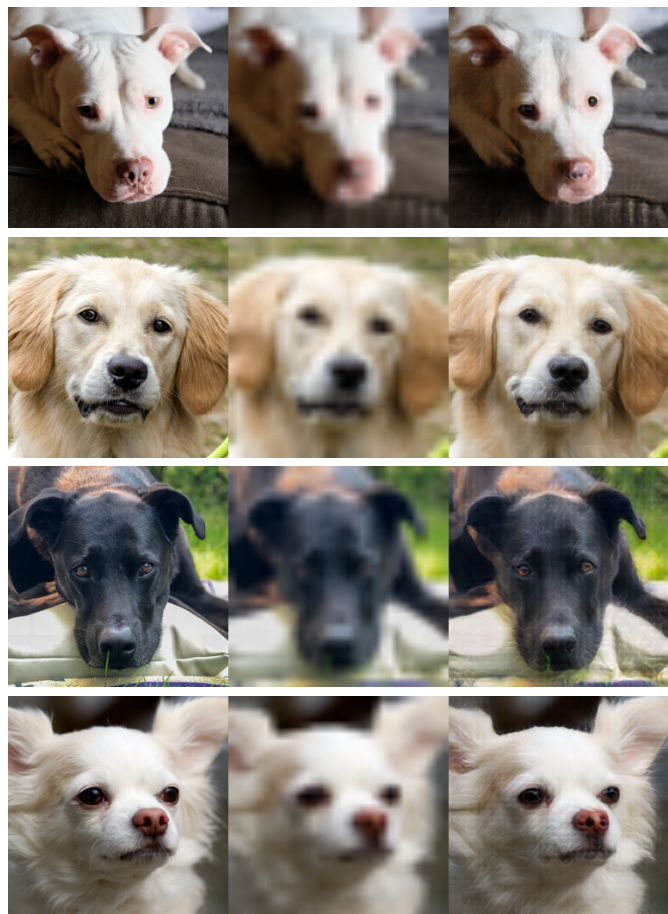

Figure 10. Additional Results generated by SLI-pSp for Super-resolution task (8x downsampling) on AFHQ-Dog Dataset
